# Supplementary material for: Chemical Compositions, Chromatographic Fingerprints and Antioxidant Activities of Andrographis Herba
Source: PubMed Central journal article supplement (PMC6270826; doi:10.3390/molecules191118332), 2014-11-10
Supplement: molecules-19-18332-s001.pdf [file molecules-19-18332-s001.pdf]

# Supplementary Materials

**Figure S1.** Chromatograms of AH-01 extracted using ethanol for three times and the peak areas of andrographolide and dehydroandrographolide.

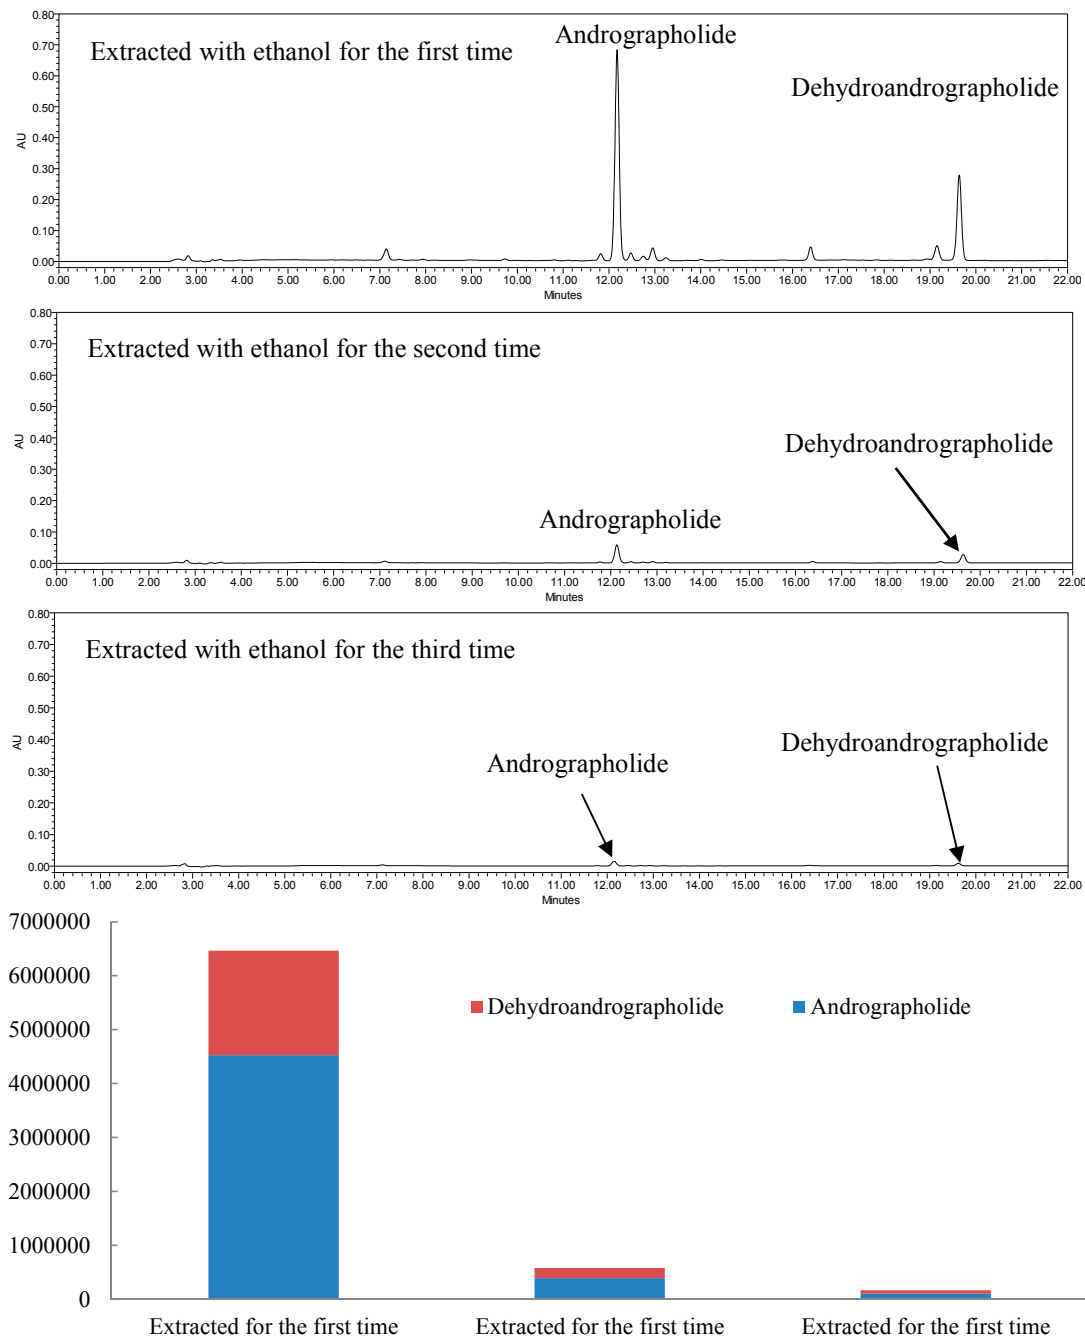

**Figure S2.** Chromatograms of AH-01 extracted using methanol for three times and the peak areas of andrographolide and dehydroandrographolide.

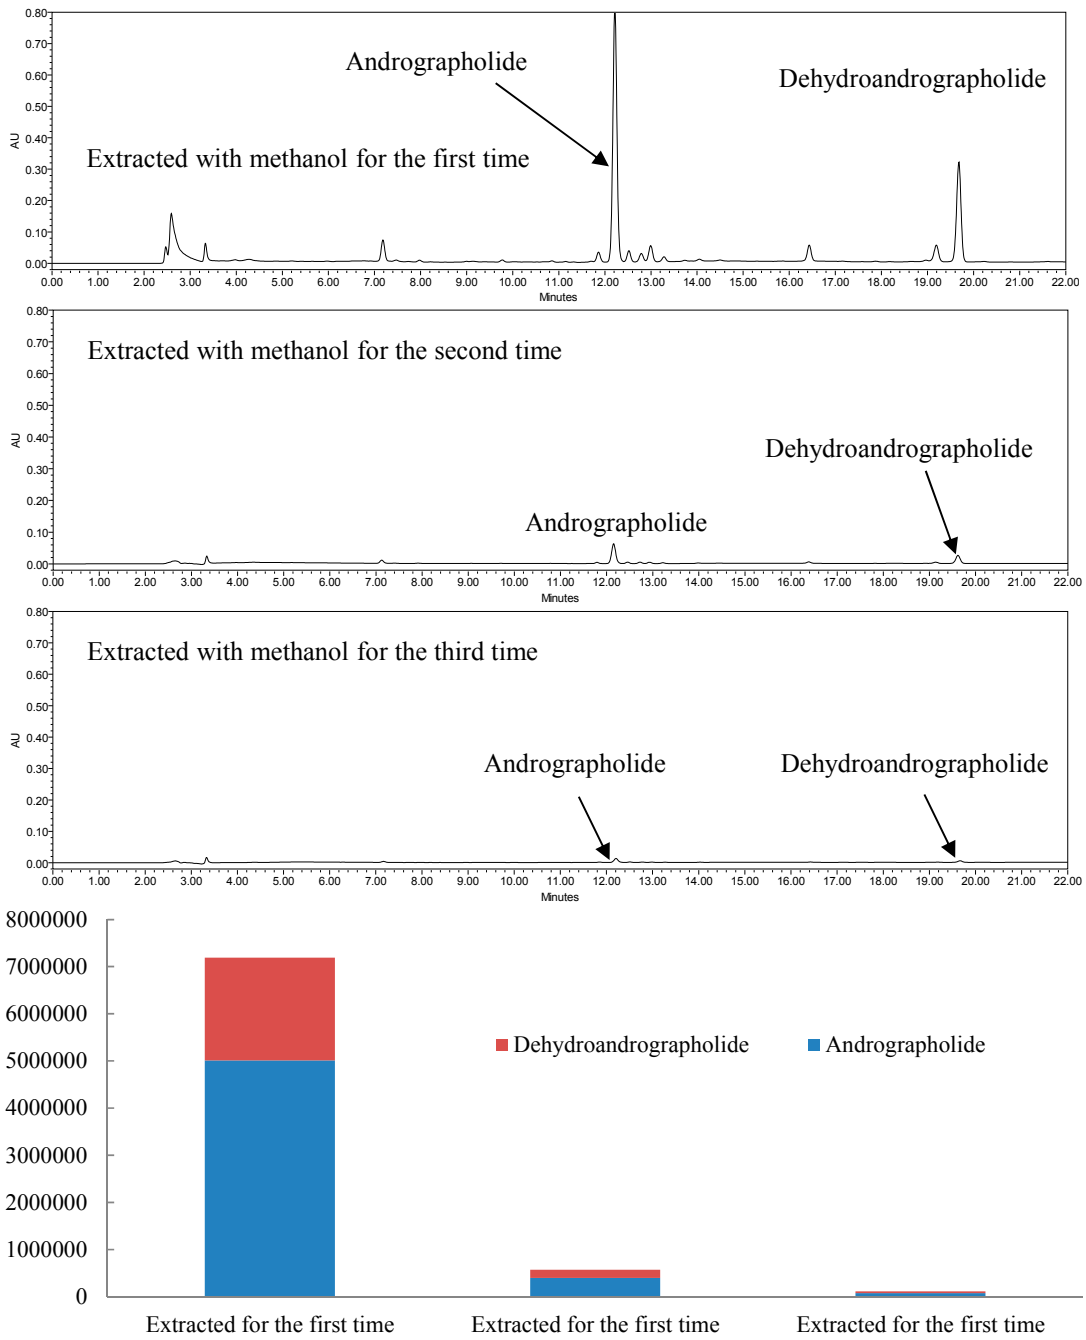

**Table S1.** RSDs of relative retention times and relative peak areas of the ten characteristic peaks.

| Peak No. | Inter-day Precision |      | Intra-day Precision |      | Repeatability |      | Stability |      |
|----------|---------------------|------|---------------------|------|---------------|------|-----------|------|
|          | RRT                 | RPA  | RRT                 | RPA  | RRT           | RPA  | RRT       | RPA  |
| 1        | 0.12                | 0.99 | 0.33                | 2.07 | 0.00          | 3.03 | 0.01      | 1.22 |
| 2        | 0.02                | 1.66 | 0.01                | 1.90 | 0.07          | 1.72 | 0.15      | 3.77 |
| 3        | 0.00                | 0.00 | 0.00                | 0.00 | 0.00          | 0.00 | 0.00      | 0.00 |
| 4        | 0.02                | 1.43 | 0.01                | 1.16 | 0.06          | 1.00 | 0.06      | 3.47 |
| 5        | 0.03                | 2.14 | 0.02                | 3.41 | 0.01          | 3.43 | 0.12      | 3.93 |
| 6        | 0.03                | 0.43 | 0.02                | 0.80 | 0.02          | 2.32 | 0.06      | 2.08 |
| 7        | 0.04                | 0.88 | 0.01                | 3.59 | 0.04          | 2.98 | 0.07      | 4.43 |
| 8        | 0.11                | 0.52 | 0.05                | 1.42 | 0.07          | 0.64 | 0.20      | 1.15 |
| 9        | 0.12                | 0.44 | 0.11                | 1.38 | 0.07          | 1.37 | 0.55      | 0.82 |
| 10       | 0.13                | 0.22 | 0.12                | 0.38 | 0.08          | 0.33 | 0.64      | 0.91 |

**Table S2.** Similarity values for the chromatographic fingerprinting method.

| Parameters              | Value        | Similarity          |                     |               |           |
|-------------------------|--------------|---------------------|---------------------|---------------|-----------|
|                         |              | Inter-day precision | Intra-day precision | Repeatability | Stability |
| Correlation coefficient | Mean value   | >0.99               | >0.99               | >0.99         | >0.99     |
|                         | Median value | >0.99               | >0.99               | >0.99         | >0.99     |
| Angle cosin             | Mean value   | >0.99               | >0.99               | >0.99         | >0.99     |
|                         | Median value | >0.99               | >0.99               | >0.99         | >0.99     |
